# Supplementary material
Source: PubMed Central journal article supplement (PMC4935642)
Supplement: NIHMS791550-supplement-1.pdf [file NIHMS791550-supplement-1.pdf]

# SUPPLEMENTAL FIGURE 1

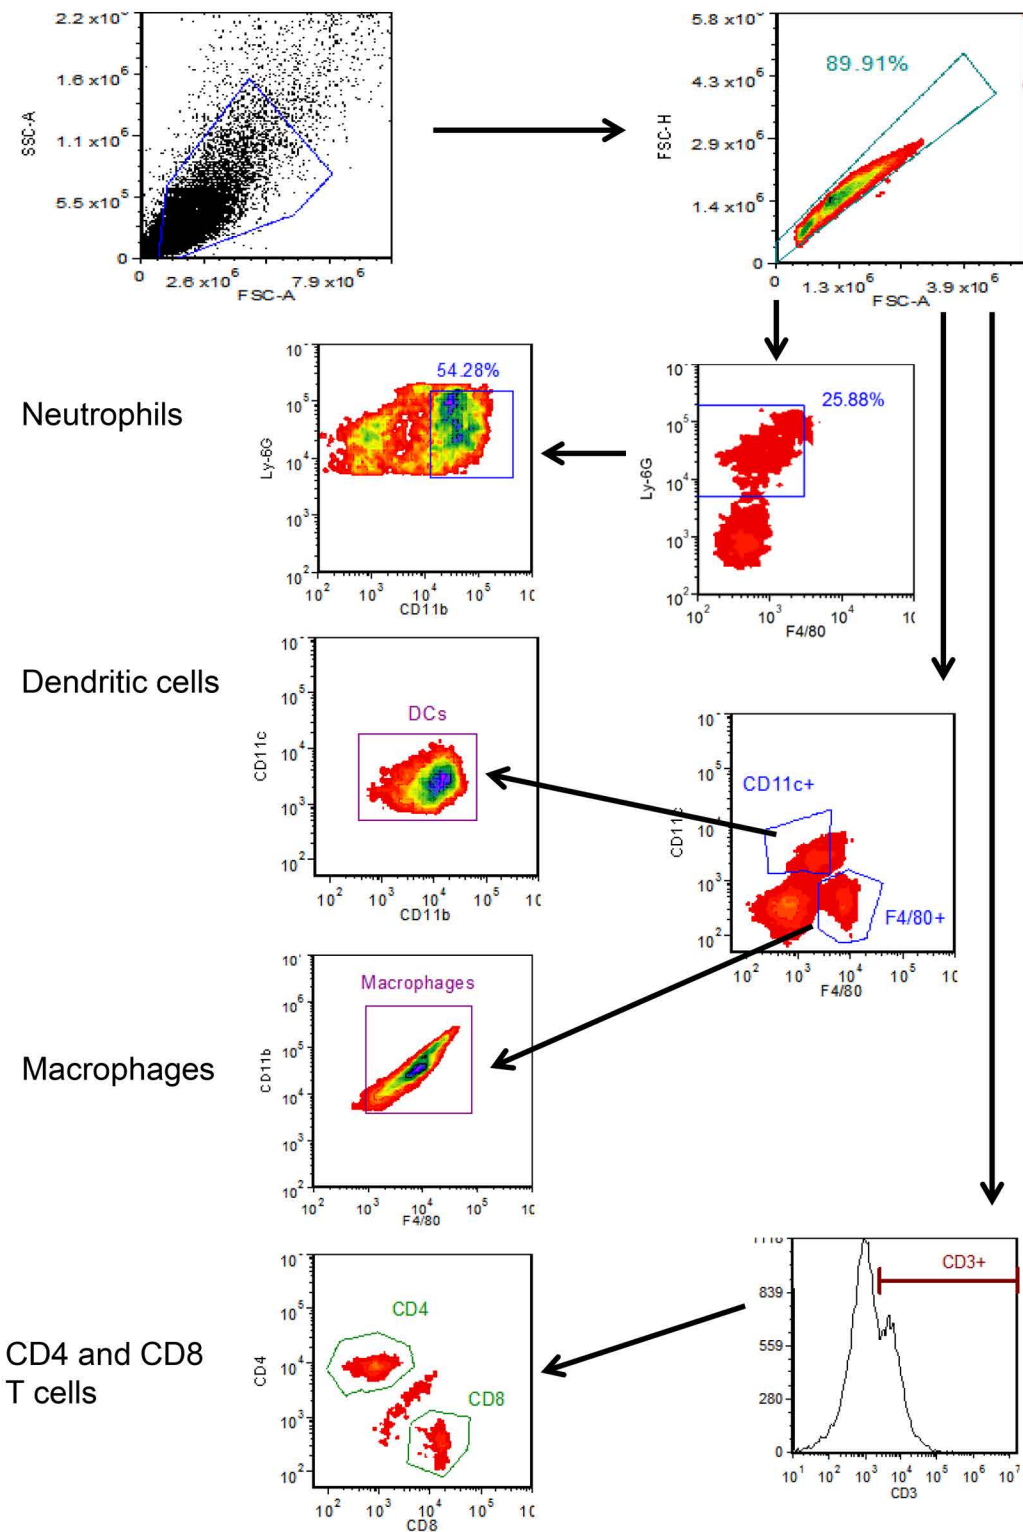

**SUPPLEMENTAL FIGURE 1.** Gating Strategy. Cells were identified using side (SSC-A) and forward scatter (FSC-A), followed by doublet exclusion using forward scatter height (FSC-H) against FSC-A. Cells were subsequently phenotypically characterized by the following surface markers: neutrophils (PMNs) were Ly-6G<sup>hi</sup>, CD11b<sup>+</sup>, F4/80<sup>-</sup>; dendritic cells (DCs) were F4/80<sup>-</sup>, CD11b<sup>-/+</sup>, CD11c<sup>+</sup>; Mφ were F4/80<sup>+</sup>, CD11c<sup>-</sup>, CD11b<sup>+</sup>; CD4 T cells were CD3<sup>+</sup>, CD4<sup>+</sup>, CD8<sup>-</sup>; CD8 T cells were CD3<sup>+</sup>, CD4<sup>-</sup>, CD8<sup>+</sup>.

## SUPPLEMENTAL FIGURE 2

A

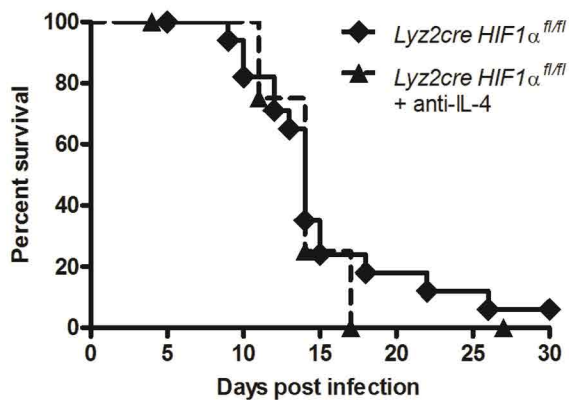

**SUPPLEMENTAL FIGURE 2.** IL-4 neutralization does not enhance survival of *Lyz2cre Hif1 $\alpha^{fl/fl}$*  mice. *Lyz2cre Hif1 $\alpha^{fl/fl}$*  mice were infected in the presence or absence of anti-IL-4 antibody and survival recorded when mice were moribund. (n=4-6 mice/group; representative of three experiments)

### SUPPLEMENTAL FIGURE 3

A

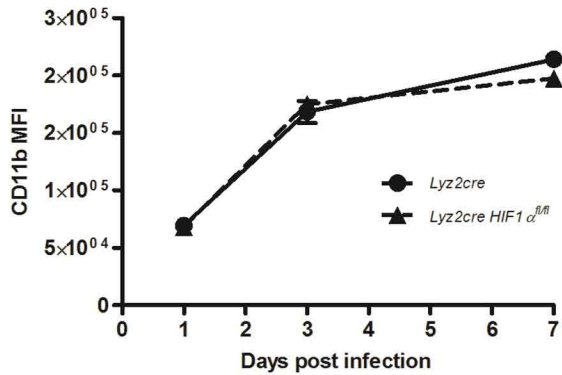

B

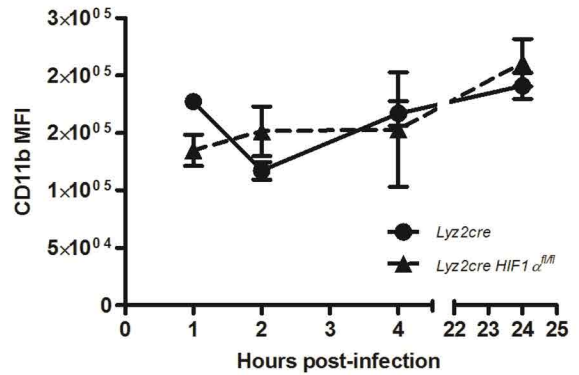

**SUPPLEMENTAL FIGURE 3.** CD11b expression on *Lyz2cre Hif1 $\alpha^{fl/fl}$*  lung M $\phi$ s or BMDM $\phi$ s is not altered compared to *Lyz2cre* control cells. *A*, *Lyz2cre* and *Lyz2cre Hif1 $\alpha^{fl/fl}$*  mice were infected for 1, 3, or 7 days. M $\phi$  were isolated from the lungs of these animals and CD11b expression was assessed. (n=4-6 mice/group; representative of three experiments) *B*, CD11b expression on BMDM $\phi$ s was determined following 1, 2, 4, or 24 h of infection. (n=4-6 mice/group; representative of three experiments)
